# Supplementary material for: Aerobic copper/TEMPO-catalyzed oxidation of primary alcohols to aldehydes using a microbubble strategy to increase gas concentration in liquid phase reactions
Source: Royal Society of Chemistry journal article supplement (doi:10.1039/c0cc04377j), 2011-01-01

## Electronic Supplementary Information

Aerobic copper/TEMPO-catalyzed oxidation of primary alcohols to aldehydes using microbubble strategy to increase gas concentration in liquid phase reactions

Nobuyuki Mase,\* Tomoya Mizumori and Yuji Tatemoto

Department of Molecular Science, Faculty of Engineering, Shizuoka University, 3-5-1 Johoku, Hamamatsu 432-8561, Japan

tnmase@ipc.shizuoka.ac.jp

### General

Chemicals and solvents were either purchased from commercial suppliers or purified by standard techniques. For thin-layer chromatography (TLC), silica gel plates (Merck 60 F<sub>254</sub>) were used and compounds were visualized by irradiation with UV light and/or by treatment with a solution of phosphomolybdic acid in ethanol followed by heating. Microbubble generator was used ASPU Co. Ltd. MA2FS (pumping rate 120-150 mL/min). Flash column chromatography was performed using KANTO silica gel 60N (particle size 63-210  $\mu\text{m}$ ). <sup>1</sup>H NMR spectra were recorded on JEOL JNM-AL spectrometer at ambient temperature. Chemical shifts are given in  $\delta$  relative to tetramethylsilane (TMS), the coupling constants *J* are given in Hz. The spectra were recorded in CDCl<sub>3</sub> as solvent at ambient temperature, TMS served as internal standard ( $\delta = 0$  ppm) for <sup>1</sup>H NMR. GC was carried out using SHIMADZU GC-2010 with capillary column GL Sciences TC-17. Oxidation reactions of the primary alcohol were carried out using Microbubble generator (MA2-FS, pumping rate 120-150 mL/min, Figure 2, upper right), which was custom-ordered in cooperation with Asupu Company Limited. All stainless steel-components were replaced with Teflon<sup>®</sup>.

### Organic substrates

benzyl alcohol (**1a**, 100-51-6), 4-isopropylbenzyl alcohol (**1b**, 536-60-7), 4-methoxybenzyl alcohol (**1c**, 105-13-5), 4-hydroxybenzyl alcohol (**1d**, 623-05-2), 4-nitrobenzyl alcohol (**1e**, 619-73-8), 4-chlorobenzyl alcohol (**1f**, 873-76-7), 4-bromobenzyl alcohol (**1g**, 873-75-6), 1,10-phenanthroline (**4a**, 66-71-7), 2,2'-bipyridine (**4b**, 366-18-7), potassium *tert*-butoxide (**5a**, 865-47-4), sodium methoxide (**5b**, 124-41-4), copper bromide (II) (7789-45-9), 2,2,6,6-tetramethylpiperidine *N*-oxyl (TEMPO, 2564-83-2), acetonitrile (75-05-8), distilled water, 1-phenylethanol (**6**, 98-85-1), geraniol (**8**, 106-24-1), myrtenol (**10**, *rac*-515-00-4, *1R*-19894-97-4, *1S*-6712-78-3) and 1-octanol (111-87-5) were all commercially available and were used without any purification. benzaldehyde (**2a**, 100-52-7), 4-isopropylbenzaldehyde (**2b**, 122-03-2), 4-methoxybenzaldehyde (**2c**, 123-11-5), 4-hydroxybenzaldehyde (**2d**, 123-08-0), 4-nitrobenzaldehyde (**2e**, 555-16-8), 4-chlorobenzaldehyde (**2f**, 104-88-1), 4-bromobenzaldehyde (**2g**, 1122-91-4), benzoic acid (**3a**, 65-85-0), acetophenone (**7**, 98-86-2), citral (**9**, (*E*, *Z*)-5392-40-5, (*E*)-141-27-5 (*Z*)-106-26-3), myrtenal (**11**, *rac*-564-94-3, *1S*-23727-16-4, *1R*-18486-69-6) and octanal (124-13-0) were all commercially available and were used as an authentic sample without any purification.

### Typical procedure for aerobic copper/TEMPO-catalyzed oxidation of primary alcohols to aldehydes using microbubble strategy

The oxidation was carried out in a 50 mL vial equipped with a microbubble generator. The alcohol (20 mmol) was dissolved in CH<sub>3</sub>CN/H<sub>2</sub>O (2:1, 30 mL), then warmed to 30 °C. To the solution NaOMe (**5b**, 81.0 mg, 1.5 mmol) and CuBr<sub>2</sub> (215.2 mg, 1.5 mmol) were added, resulting in a light blue suspension. After addition of 2,2-bipyridine (**4b**, 234.4 mg, 1.5 mmol) to the suspension, color was changed to blue-green. To the mixture TEMPO (312.5 mg, 2.0 mmol) was added, leading to a red-brown mixture. Air-Microbubble was introduced into the reaction mixture by microbubble generator at air-flow rate 3 mL/min. The red-brown mixture gradually turned dark-green. Sampling was carried out as follows: 1 mL sample of the reaction mixture was taken out and extracted with Et<sub>2</sub>O (4 x 1 mL), washed with brine (1 mL). The combined organic extracts were filtrated through silica gel plug (SiO<sub>2</sub>: 1 g, Na<sub>2</sub>SO<sub>4</sub>: 1 g) to give a sample, which were taken out to monitor the reaction by GC. The products were determined by comparison with the commercially available aldehydes as an external standard.

GC (TC-17, He = 0.80 MPa, H<sub>2</sub> = 0.5 MPa, Air = 0.5 MPa)

| No.       | Structure                                                                           | T <sub>inj</sub><br>(°C) | T <sub>det</sub><br>(°C) | T <sub>i</sub><br>(°C, min) | T <sub>f</sub><br>(°C, min) | Rate<br>(°C/min) | GC: t <sub>R</sub><br>(min) |
|-----------|-------------------------------------------------------------------------------------|--------------------------|--------------------------|-----------------------------|-----------------------------|------------------|-----------------------------|
| <b>1a</b> | 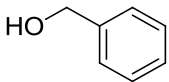  | 250                      | 250                      | 100, 5                      | 200, 0                      | 10               | 9.183                       |
| <b>1b</b> |  | 250                      | 250                      | 100, 0                      | 250, 0                      | 10               | 9.150                       |
| <b>1c</b> |  | 260                      | 260                      | 100, 0                      | 250, 5                      | 5                | 14.647                      |
| <b>1d</b> |  | 260                      | 260                      | 100, 5                      | 250, 0                      | 5                | 21.857                      |
| <b>1e</b> |  | 250                      | 250                      | 100, 0                      | 250, 10                     | 10               | 14.120                      |
| <b>1f</b> |  | 250                      | 250                      | 100, 0                      | 250, 5                      | 10               | 9.007                       |

| No.       | Structure                                                                           | T <sub>inj</sub><br>(°C) | T <sub>det</sub><br>(°C) | T <sub>i</sub><br>(°C, min) | T <sub>f</sub><br>(°C, min) | Rate<br>(°C/min) | GC: t <sub>R</sub><br>(min) |
|-----------|-------------------------------------------------------------------------------------|--------------------------|--------------------------|-----------------------------|-----------------------------|------------------|-----------------------------|
| <b>1g</b> | 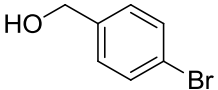   | 250                      | 250                      | 100, 0                      | 250, 5                      | 10               | 10.663                      |
| <b>2a</b> |    | 250                      | 250                      | 100, 5                      | 200, 0                      | 10               | 7.623                       |
| <b>2b</b> |    | 250                      | 250                      | 100, 0                      | 250, 0                      | 10               | 8.430                       |
| <b>2c</b> |    | 260                      | 260                      | 100, 0                      | 250, 5                      | 5                | 14.130                      |
| <b>2d</b> |   | 260                      | 260                      | 100, 5                      | 250, 0                      | 5                | 22.300                      |
| <b>2e</b> |  | 250                      | 250                      | 100, 0                      | 250, 10                     | 10               | 11.487                      |
| <b>2f</b> |  | 250                      | 250                      | 100, 0                      | 250, 5                      | 10               | 7.390                       |
| <b>2g</b> |  | 250                      | 250                      | 100, 0                      | 250, 5                      | 10               | 9.020                       |
| <b>3a</b> |  | 250                      | 250                      | 100, 5                      | 200, 0                      | 10               | 11.805                      |
| <b>6</b>  |  | 250                      | 250                      | 100, 10                     | 250, 0                      | 10               | 12.440                      |

| No. | Structure                                                                           | T <sub>inj</sub><br>(°C) | T <sub>det</sub><br>(°C) | T <sub>i</sub><br>(°C, min) | T <sub>f</sub><br>(°C, min) | Rate<br>(°C/min) | GC: t <sub>R</sub><br>(min) |
|-----|-------------------------------------------------------------------------------------|--------------------------|--------------------------|-----------------------------|-----------------------------|------------------|-----------------------------|
| 7   |    | 250                      | 250                      | 100, 10                     | 250, 0                      | 10               | 13.330                      |
| 8   |    | 250                      | 250                      | 100, 10                     | 200, 0                      | 5                | 17.530                      |
| 9   |    | 250                      | 250                      | 100, 10                     | 200, 0                      | 5                | 18.930 (Z)<br>20.177 (E)    |
| 10  |    | 250                      | 250                      | 100, 0                      | 250, 0                      | 10               | 7.300                       |
| 11  |   | 250                      | 250                      | 100, 0                      | 250, 0                      | 10               | 7.727                       |
|     |  | 250                      | 250                      | 100, 5                      | 200, 0                      | 10               | 7.507                       |
|     |  | 250                      | 250                      | 100, 5                      | 200, 0                      | 10               | 6.303                       |

## Synthesis and isolation of geranial (**9**) using microbubble strategy

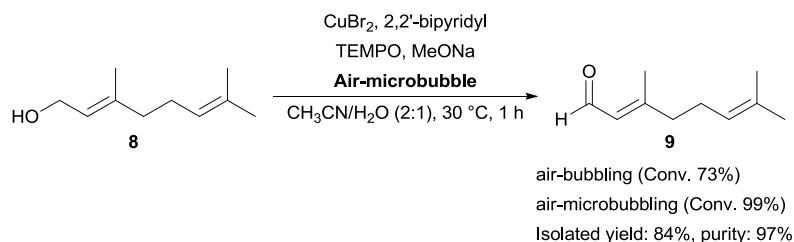

Geraniol (**8**, 20 mmol) was dissolved in CH<sub>3</sub>CN/H<sub>2</sub>O (2:1, 30 mL), then warmed to 30 °C. To the solution, sodium methoxide (**5b**, 81.0 mg, 1.5 mmol) and copper bromide (II) (215.2 mg, 1.5 mmol) were added, resulting in a light blue suspension. After addition of 2,2-bipyridyl (**4b**, 234.4 mg, 1.5 mmol) to the suspension, colour was changed to blue-green. To the mixture TEMPO (312.5 mg, 2.0 mmol) was added, leading to a red-brown mixture. Air-Microbubble was introduced into the reaction mixture by microbubble generator at air-flow rate 3 mL/min. The red-brown mixture gradually turned dark-green. After 1 h, reaction mixture was quenched by the addition of saturated NH<sub>4</sub>Cl aq (12 mL). Aqueous layer was extracted with Et<sub>2</sub>O (2 x 20 mL) and AcOEt (10 mL). The combined organic layers were washed with brine (1 x 50 mL), filtrated through silica gel plug (SiO<sub>2</sub>: 15 g, Na<sub>2</sub>SO<sub>4</sub>: 20 g) and concentrated *in vacuo*. The resulting liquid product was purified by reduced-pressure distillation (bp. 68-69 °C/1.6 mmHg), giving geranial (**9**) (2544.4 mg, y. 84%, purity >97% (determined by GC), (*E*):(*Z*) = 99 : 1 (determined by GC and <sup>1</sup>H NMR): *R*<sub>f</sub> = 0.73 (hexane:AcOEt = 70:30); <sup>1</sup>H NMR (CDCl<sub>3</sub>, 300 MHz); δ = 10.0 (d, *J* = 8.0 Hz, 1H, CHO), 5.90-5.87 (m, 1H C=CHCHO), 5.10-5.07 (m, 1H, C=CH), 2.26-2.19 (m, 4H, CH<sub>2</sub>), 2.17 (d, *J* = 1.2 Hz, CH<sub>3</sub>), 1.69 (s, CH<sub>3</sub>) 1.61 (s, CH<sub>3</sub>); GC (TC-17, T<sub>inj</sub> = 250 °C, T<sub>det</sub> = 250 °C, He = 0.8 MPa, H<sub>2</sub> = 0.5 MPa, Air = 0.5 MPa, T<sub>i</sub> = 100 °C (10 min), T<sub>f</sub> = 250 °C (5 °C /min, 10 min): *t*<sub>R</sub> = 20.177 min (*E*), 18.903 min (*Z*).

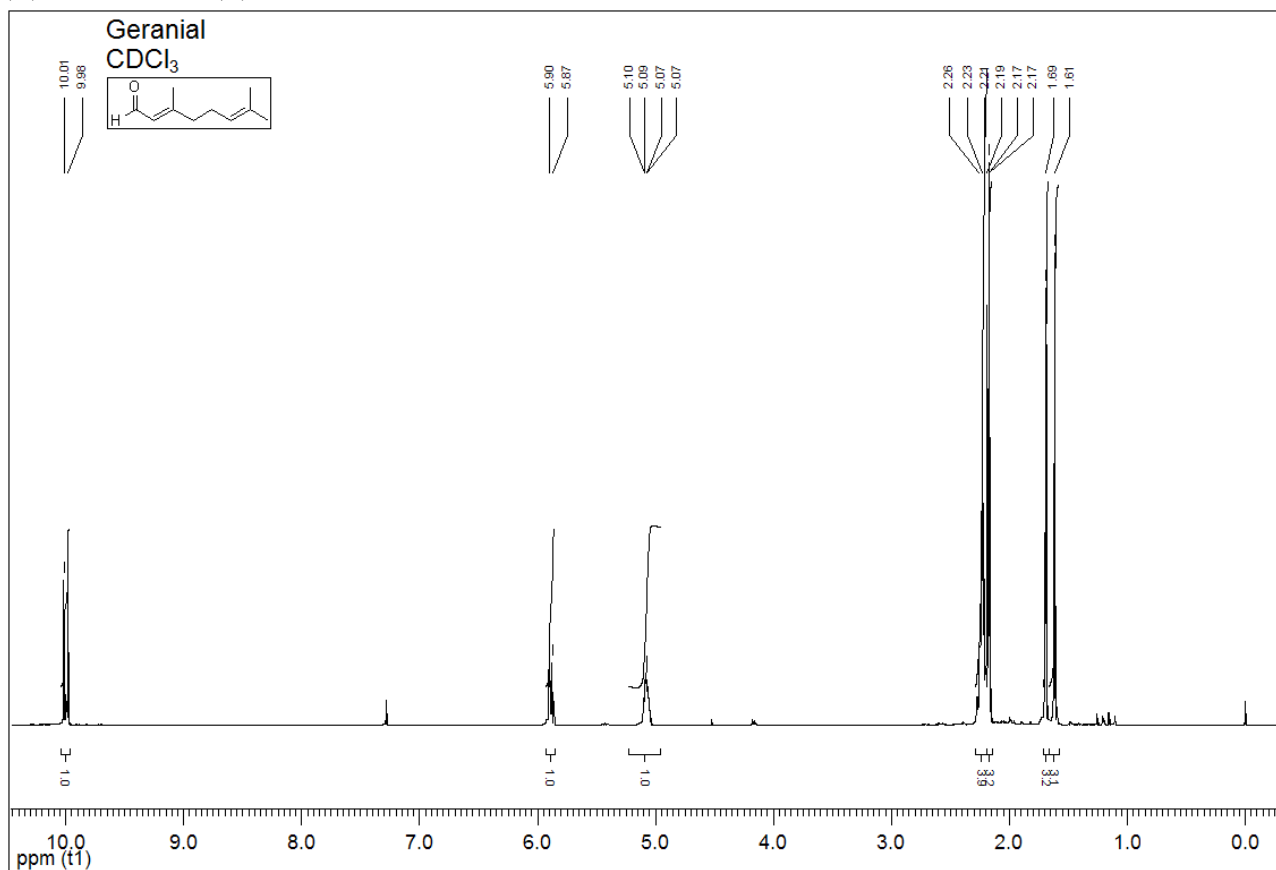

<sup>1</sup>H NMR

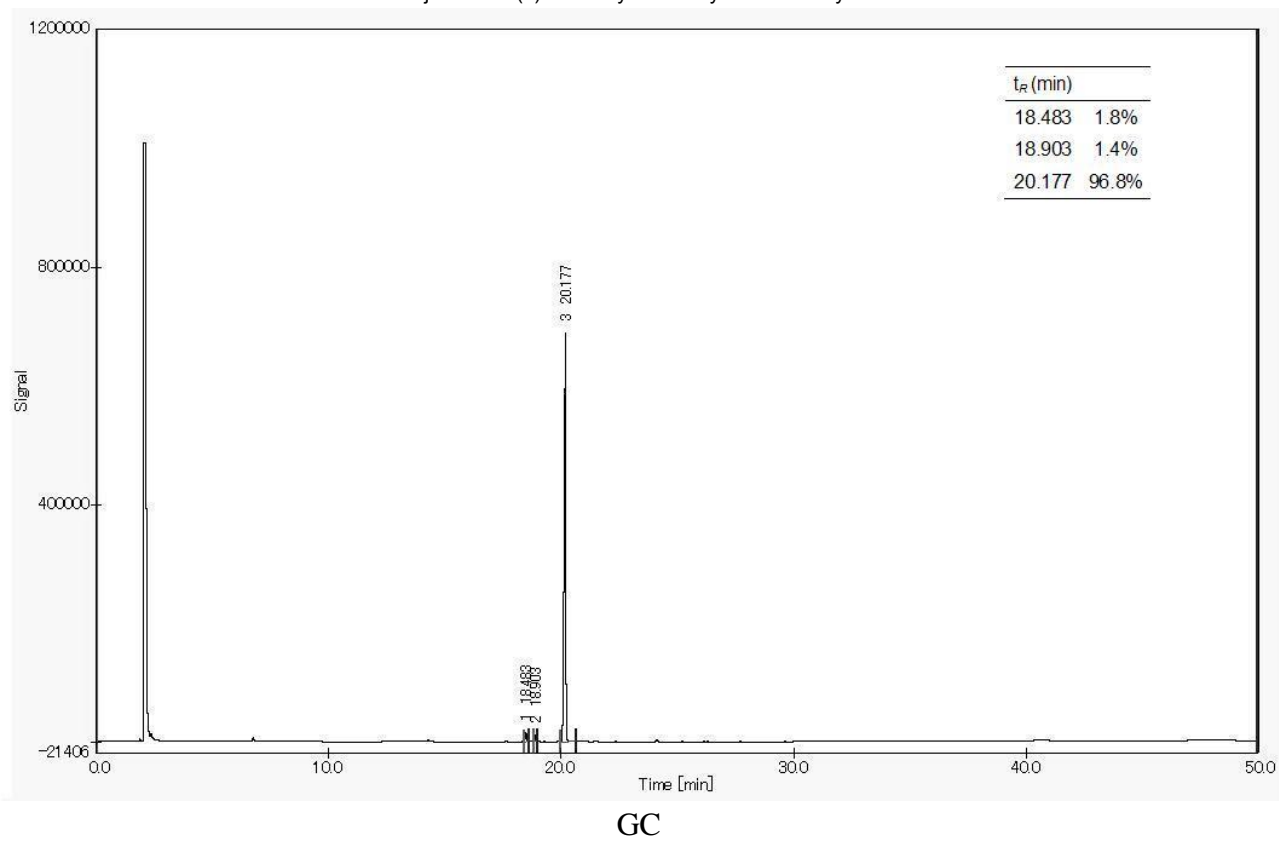

Supplement: c0cc04377j.pdf [file c0cc04377j.pdf]
